# Supplementary material for: Contraceptive Knowledge and Influencing Factors Among University Students in Shanghai, China: A Cross-sectional Study
Source: Research Square preprint supplement (doi:10.21203/rs.3.rs-6394972/v1), 2025-05-30
Supplement: Supplementary file 1 [file 4cfdfb31472d2e881f252f9a.docx]

**Contraceptive Knowledge Assessment (CKA) Scale**

Please select the option that best fits your actual situation under each question.

1. In which phase of the menstrual cycle do you think a woman is most likely to become pregnant? (Menstrual cycle: The period from the first day of menstruation to the day before the next menstruation is considered one menstrual cycle)

a. During menstruation (the beginning of the cycle)

b. Within three days after the end of menstruation

c. Two weeks before the next menstruation

d. Three days before the next menstruation

e. I don't know

2. How long do you think sperm can survive inside a woman's body?

a. 1-3 hours

b. 24 hours

c. 3-5 days

d. 7-10 days

e. I don't know

3. Which of the following statements about pregnancy is correct?

a. Pregnancy cannot occur during the first sexual intercourse

b. Pregnancy cannot occur if the sexual intercourse is performed in a standing position

c. Pregnancy cannot occur if the woman does not experience an orgasm during sexual intercourse

d. All of the above statements are incorrect

e. I don't know

4. Which of the following statements about coitus interruptus (withdrawal method) is correct? (Coitus interruptus refers to the practice where the male withdraws his penis and ejaculates outside the body during sexual climax)

a. Some semen may leak out before ejaculation

b. The contraceptive effectiveness of coitus interruptus is the same as using a condom

c. Coitus interruptus can prevent certain sexually transmitted diseases

d. The contraceptive effectiveness of coitus interruptus is the same as taking oral contraceptives

e. I don't know

5. Which of the following contraceptive methods can guarantee that pregnancy will not occur?

a. No method can achieve a 100% contraceptive rate

b. Using a condom every time during sexual intercourse

c. Taking a shower immediately after sexual intercourse

d. Using the coitus interruptus method

e. I don't know

6. Which of the following contraceptive methods can prevent sexually transmitted diseases?

a. Taking oral contraceptives

b. Using male or female condoms

c. Medroxyprogesterone acetate contraceptive injection (a type of injection with a contraceptive effect lasting three months)

d. Intrauterine device (IUD)

e. I don't know

7. Which of the following statements about male condom use is incorrect?

a. Condoms containing spermicide should be used

b. Using two condoms at once can increase contraceptive effectiveness

c. Expel the air from the condom's tip before use

d. Check the condom's expiration date and store it in a cool, dry place (e.g., not in a wallet or car)

e. I don't know

8. Which of the following methods can achieve contraceptive effects using hormonal contraception (estrogen/progestin)?

a. Oral medication

b. Contraceptive skin patch

c. Vaginal ring

d. All of the above

e. I don't know

9. Which of the following is NOT a benefit of using hormonal contraception?

a. Improving diabetes

b. Improving acne

c. Reducing menstrual problems, such as dysmenorrhea and anemia

d. Lowering the risk of ovarian and endometrial cancer

e. I don't know

10. What is the replacement cycle for the vaginal ring? (Vaginal ring NuvaRing: A contraceptive ring placed in the vagina releases hormones slowly, which are absorbed by the vaginal mucosa to exert a contraceptive effect)

a. 1 day

b. 1 week

c. 3 weeks

d. 1 month

e. I don't know

11. Which of the following drugs can weaken the effectiveness of hormonal contraception?

a. Antiepileptic drugs

b. HIV treatment drugs

c. Traditional Chinese medicine supplements

d. All of the above

e. I don't know

12. What is the main mechanism of action of oral contraceptives?

a. Preventing ovulation from the ovaries

b. Blocking sperm from entering the uterus

c. Preventing implantation of the fertilized egg in the uterus

d. Preventing embryonic development

e. I don't know

13. What is the main component of oral contraceptives?

a. Testosterone

b. Estrogen

c. Magnesium

d. Calcium

e. I don't know

14. In which of the following situations is it not recommended to take oral contraceptives?

a. Having uterine fibroids

b. Recent alcohol consumption

c. During antibiotic treatment

d. No contraindications for use

e. I don't know

15. How soon after stopping short-acting contraceptives can one become pregnant?

a. Immediately

b. 1 month

c. 3 months

d. 6 months

e. I don't know

16. Which of the following statements about long-acting contraceptives (e.g., medroxyprogesterone acetate) is incorrect?

a. It is used once every three months

b. It may lead to gradual weight gain

c. Pregnancy can only occur months after stopping the medication

d. Contraindicated during breastfeeding

e. I don't know

17. Which of the following contraceptive methods is least likely to be detected by a partner?

a. Intrauterine device (IUD)

b. Vaginal ring

c. Male condom

d. Female condom

e. I don't know

18. Where does the doctor place the intrauterine device (IUD) in the body?

a. Fallopian tube

b. Uterus

c. Cervix

d. Vagina

e. I don't know

19. Which of the following contraceptive methods is the most effective?

a. Intrauterine device (IUD)

b. Long-acting contraceptive injection

c. Male condom

d. Coitus interruptus

e. All methods are equally effective

f. I don't know

20. Which of the following statements about intrauterine devices (IUDs) is incorrect?

a. Women of all ages can use this method for contraception

b. Women who have never given birth can use this method for contraception

c. Women can have an IUD placed immediately after childbirth or abortion

d. Women who have had sexually transmitted diseases cannot use this method for contraception

e. I don't know

21. Where do doctors usually implant long-acting contraceptives subcutaneously in women's bodies?

a. Thigh

b. Vagina

c. Arm

d. Buttock

e. I don't know

22. How long after sexual intercourse can emergency contraceptives be used to effectively prevent pregnancy?

a. 1 hour

b. 24 hours

c. 5 days

d. 20 days

e. I don't know
